# Supplementary material
Source: PubMed Central journal article supplement (PMC5576528)
Supplement: NIHMS73910-supplement-Supplementary_figure_1.pdf [file NIHMS73910-supplement-Supplementary_figure_1.pdf]

A. Time spent in the centre

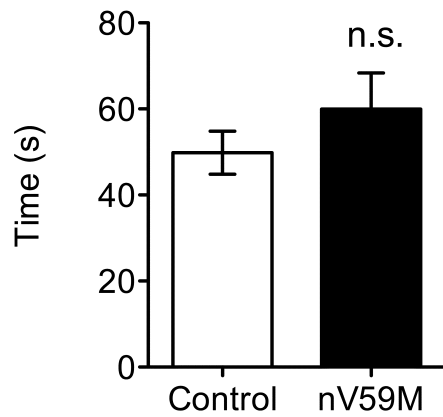

B. Entries into the centre

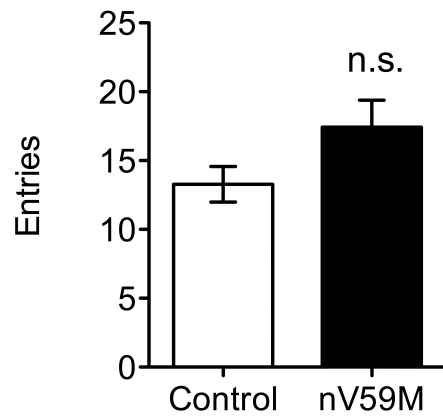

Supplementary Figure 1: Plus maze test

(**A**) Amount of time spent in the centre square and (**B**) number of entries into the centre square for adult (11-20 week-old) control (wild-type: n=1; ROSA<sup>+/-</sup>: n=12; Nes-Cre<sup>+</sup>: n=13) and nV59M (n=14) littermates over a 300s period. Data are mean  $\pm$  SEM. n.s. not statistically significant [Mann-Whitney U-test].
